1                   **Title: Prototypical pacemaker neurons are immunocompetent cells**

2                   **Authors:** Alexander Klimovich<sup>1\*</sup>, Stefania Giacomello<sup>2</sup>, Åsa Björklund<sup>3</sup>, Louis Faure<sup>4</sup>, Marketa  
3                   Kaucka<sup>4,5,6</sup>, Christoph Giez<sup>1</sup>, Andrea P. Murillo-Rincon<sup>1</sup>, Ann-Sophie Matt<sup>1</sup>, Gabriele Crupi<sup>1</sup>,  
4                   Jaime de Anda<sup>7</sup>, Gerard C.L. Wong<sup>7</sup>, Mauro D'Amato<sup>8</sup>, Igor Adameyko<sup>4,5</sup>, Thomas C.G.  
5                   Bosch<sup>1\*</sup>

6                   **Affiliations:**

7                   <sup>1</sup>Zoological Institute, University of Kiel, Kiel, Germany.

8                   <sup>2</sup>Department of Biochemistry and Biophysics, National Infrastructure of Sweden, Science for  
9                   Life Laboratory, Stockholm University, Solna, Sweden.

10                  <sup>3</sup>Department of Cell and Molecular Biology, National Infrastructure of Sweden, Science for Life  
11                  Laboratory, Uppsala University, Uppsala, Sweden.

12                  <sup>4</sup>Department of Molecular Neurosciences, Center for Brain Research, Medical University  
13                  Vienna, Vienna, Austria.

14                  <sup>5</sup>Department of Physiology and Pharmacology, Karolinska Institutet, Stockholm, Sweden.

15                  <sup>6</sup>Department of Evolutionary Genetics, Max Planck Institute for Evolutionary Biology, Plön,  
16                  Germany.

17                  <sup>7</sup>Department of Bioengineering, Department of Chemistry and Biochemistry, and California  
18                  NanoSystems Institute, University of California Los Angeles, Los Angeles, USA.

19                  <sup>8</sup>School of Biological Sciences, Monash University, Clayton, Australia.

20  
21                  \*Correspondence to: [tbosch@zoologie.uni-kiel.de](mailto:tbosch@zoologie.uni-kiel.de) (T.B.) and [aklimovich@zoologie.uni-kiel.de](mailto:aklimovich@zoologie.uni-kiel.de)  
22                  (A.K.)  
23

1  
2  
3  
4  
5  
6  
7  
8  
9  
10  
11  
12  
13  
14  
15  
16  
17  
18  
19  
20  
21  
22  
23  
24

**Pacemaker neurons exert control over neuronal circuit function by their intrinsic ability to generate rhythmic bursts of action potential. Recent work has identified rhythmic gut contractions in human, mice and hydra to be dependent on both neurons and the resident microbiota. However, little is known about the evolutionary origin of these neurons and their interaction with microbes. In this study, we identified and functionally characterized prototypical ANO/SCN/TRPM ion channel expressing pacemaker cells in the basal metazoan *Hydra* by using a combination of single-cell transcriptomics, immunochemistry, and functional experiments. Unexpectedly, these prototypical pacemaker neurons express a rich set of immune-related genes mediating their interaction with the microbial environment. Functional experiments validated a model of the evolutionary emergence of pacemaker cells as neurons using components of innate immunity to interact with the microbial environment and ion channels to generate rhythmic contractions.**

The enteric nervous system (ENS) coordinates the major functions of the gastrointestinal tract<sup>1</sup>. In all extant animals, the structurally conserved ENS is a diffuse nerve net located within the wall of the gastrointestinal tract. In pre-bilaterian animals, such as *Hydra* the nervous system is structurally simple and thus has great potential to inform us about evolutionary ancient basic structural and functional principles of neural circuits<sup>2</sup> (Fig. 1a). The principal function of the ENS is coordination of the rhythmic intestine motility, known as peristalsis, that occurs ubiquitously in the animal kingdom (Fig. 1a) and is driven by rhythmic electrical pulses generated by pacemaker cells<sup>3</sup>. In mammals, proper functioning of the interstitial cells of Cajal (ICC), that serve as pacemakers in the muscular wall of the gastrointestinal tract<sup>4-6</sup>, is essential for normal gut motility<sup>7-9</sup>. Dysfunction of the pacemaker system contributes to functional

1 gastrointestinal disorders (FGID) such as irritable bowel syndrome (IBS), chronic constipation  
2 and intestinal pseudo-obstruction<sup>9-12</sup>. The Ca<sup>2+</sup>-activated Cl<sup>-</sup>-channel Anoctamin-1 (encoded by  
3 *ANO1* gene) and the voltage-gated Na<sup>+</sup>-channel Nav1.5 (*SCN5A* gene) represent molecular  
4 markers of the interstitial pacemaker cells in human and mice<sup>13-15</sup> and DNA variants in the  
5 corresponding genes have been shown to associate with increased risk of IBS<sup>16-18</sup>. Ion channel  
6 dysfunction (channelopathy) appears to be a plausible pathogenetic mechanism in FGIDs<sup>19</sup>, as  
7 the transient receptor potential cation channel TRPM8 (known as the cold and menthol receptor)  
8 and other ion channels have also been implicated in IBS susceptibility and gut dysmotility<sup>20-23</sup>.  
9 Spontaneous contractile gut activities not only are affected by microbes. In fact, there is evidence  
10 that bacterial population dynamics themselves are affected by the periodic stimulation<sup>24</sup>.  
11 Previous studies in *Hydra* suggested that the rhythmic peristaltic movements of the body column  
12 are dependent on neurons<sup>25</sup> and that they are modulated by the host-associated microbiota since  
13 germ-free animals display reduced and less regular contraction frequencies<sup>26</sup>. However, little is  
14 known about the nature of the neurons that generate peristaltic movement in a pre-bilaterian  
15 animal and how such prototypical neurons engage with the resident microbiota.

16 Here, we provide a definition of prototypical pacemaker cells, which integrates marker genes  
17 discovered in human dysmotility patients with the recent discovery that spontaneous contractile  
18 activities are affected by microbes. The functional experiments connected the rhythm generation  
19 and interactions with microbes at the level of this specific neuronal population. These findings  
20 shed new light on the evolution of pacemaker neurons, emphasize the role of the microbial  
21 environment in dysmotility, and underscore the importance of cross-species comparisons in  
22 tracking cell type evolution.

23

## 1 Identification of pacemaker cells in *Hydra* using human orthologous genes

2 Previous studies in *Hydra* suggested that a subpopulation of neurons located in the head region<sup>27–</sup>  
3 <sup>29</sup> might have properties of pacemaker cells to control the regularity of spontaneous body  
4 contractions. To gain insight into this specific cell population, we first assessed the molecular  
5 and functional diversity of the neuronal populations by single cell RNA-sequencing using RFP-  
6 labelled neurons (Fig. 1b–j, Extended Data Fig. 1 and 2). Similar to the analysis of the entire  
7 transcriptome, the expression profile of 112 transcripts coding for putative neurotransmitter  
8 receptors clearly identified seven distinct clusters of neurons and separated them from the stem  
9 cells and non-neuronal cells (Fig. 1d–f). This indicates that each neuronal subpopulation is  
10 characterized by a specific set of neurotransmitter receptors (Fig. 1g, Extended Data Fig. 3). For  
11 instance, most transcripts coding for putative nicotinic acetylcholine receptors (nAChRs) were  
12 expressed almost exclusively in neuronal subpopulation N2 (Fig. 1g, Extended Data Fig. 3),  
13 while diverse homologues of muscarinic and N-methyl-D-aspartate glutamate receptors (mGluRs  
14 and NMDARs), and  $\gamma$ -aminobutyric acid type-A receptors (GABA<sub>A</sub>Rs) were enriched in the  
15 neuronal subpopulation N7 (Fig. 1g, Extended Data Fig. 3). Similarly, the expression profiles of  
16 431 transcripts coding for ion channels clearly segregated GFP<sup>+</sup>/RFP<sup>-</sup> stem cells from the  
17 GFP<sup>low</sup>/RFP<sup>low</sup> non-neuronal cells and the seven remarkably distinct clusters of GFP<sup>-</sup>/RFP<sup>+</sup>  
18 neurons (Fig. 1h). In addition, each neuronal subpopulation was found to express a unique  
19 combination of neuropeptides (Fig. 1i, Extended Data Fig. 4). The Hym-355 neuropeptide  
20 precursor gene, for instance, was exclusively expressed in the neuronal subpopulation N3, while  
21 Hym-176A transcripts were discovered predominantly in the N1 subpopulation. Most of  
22 RFamide precursor transcripts were found in subpopulation N6 (Fig. 1i, Extended Data Fig. 4).  
23 Genes coding for some other peptides, including Hym-331 and FRamide, were expressed in two  
24 or more neuronal subpopulations. Taken together, these observations indicate that the molecular

1 identity of different subpopulations of neurons is determined by the specific expression of ion  
2 channels, neurotransmitter receptors and neuropeptides.

3 Interestingly, based on the expression profiles of 364 transcripts coding for putative transcription  
4 factors (TFs), all seven subpopulations of neurons express a common set of TFs, which separates  
5 them from stem cells and non-neuronal cell types (Extended Data Fig. 5). The neuron-specific  
6 TF signature consists mainly of Zn-finger, homeodomain and helix-loop-helix DNA-binding  
7 proteins, including the Achaete-scute homologous TFs. Further, each neuronal population is  
8 characterized by a combinatorial expression of few genes encoding other TFs, such as the  
9 homologues of *Aristales*, *NeuroD*, and *Orthopedia* (Extended Data Fig. 5b, c, Supplementary  
10 Data 1).

11 *In situ* hybridization for selected marker genes enriched in each of the seven neuronal  
12 subpopulations (Fig. 1j, Extended Data Fig. 6a) showed that the neuronal subpopulations in  
13 *Hydra* reside in spatially restricted domains along the body column. Neuronal clusters N1 were  
14 found confined to the foot region of the polyp (Fig. 1j, Extended Data Fig. 6b). Cluster N2 was  
15 represented by a population of neurons located in the base of tentacles. N3-specific neurons were  
16 spread in the ectoderm along the entire *Hydra* body, whereas neurons of subpopulations N4 and  
17 N5 were found in the endodermal epithelial layer (Fig. 1j, Extended Data Fig. 6b). Neurons from  
18 the cluster N6 were confined to the hypostome of a polyp, whereas neurons of the cluster N7  
19 were restricted to the tentacles. Notably, most of the seven spatially restricted neuronal  
20 subpopulations contain both sensory and ganglion cells (Fig. 1j). Recently, a similar molecular  
21 map of the *Hydra* nervous system was published<sup>30</sup>. The higher number of cells sequenced  
22 (~20,000) allowed Siebert and co-authors to perform deeper clustering of the neuronal  
23 population and uncover 12 differentiated neuronal subtypes. Analysis of marker gene expression

1 (Extended Data Fig. 7) indicated a clear correspondence between 7 neuronal clusters identified  
2 buy us and 12 subtypes reported by Siebert and co-authors.

3 To identify the pacemaker cells among the neurons in *Hydra*, we focused on a few human  
4 orthologs known to be either restricted in their expression to human ICCs (ANO1 and  
5 SCN5A)<sup>13,14</sup> or mechanistically involved in the control of gut motility via circular smooth  
6 muscle cell contractions (menthol sensitive Ca<sup>2+</sup> channels such as TRPM8)<sup>31</sup> (Fig. 2a).  
7 Homology search and phylogenetic analysis uncovered three *Hydra* genes coding for SCN-like  
8 sodium channels, six homologues of ANO1-like chloride channels and four homologues  
9 encoding TRPM-like cation channels, which are remarkably similar to their human counterparts  
10 (Fig. 2b–d, Extended Data Fig. 8–10). Analysis of the single cell transcriptome (Fig. 2e,  
11 Extended Data Fig. 11) revealed that the expression of genes encoding SCN-, ANO1- and  
12 TRPM-like channels overall was very weak, often restricted to only few cells. However, several  
13 of the transcripts coding for SCN- and ANO1-homologues were more expressed in neurons  
14 (Fig. 2e, Extended Data Fig. 11) with some of the transcripts specific for neuronal subpopulation  
15 N2, which is located at the base of tentacles (Fig. 1j and 2e, Extended Data Fig. 11). Real-time  
16 PCR confirmed (Fig. 2f) that most of the SCN-, ANO1- and TRPM-like ion channel genes are  
17 upregulated in the head region. Transcripts of two of these genes, *cluster2505* and *cluster30856*,  
18 coding for ANO1-like and SCN-like channels, could be detected by *in situ* hybridization at the  
19 base of tentacles (Fig. 2g, h). Immunohistochemical analysis using specific antibodies raised  
20 against synthetic peptides confirmed the presence of ANO1-like and SCN-like channel proteins  
21 at the base of the tentacles (Fig. 2i–k) in the subpopulation N2 domain (Fig. 1j). High  
22 magnification confocal microscopy identified the cells expressing SCN- and ANO1- channels as  
23 neurons (Fig. 2l, m). Taken together, these observations indicate that the genes encoding SCN-

1 and ANO1- and TRPM-like channels are expressed in a population of nerve cells resident in the  
2 subpopulation N2 at the base of tentacles (Fig. 2n).

### 4 **ANO1-, SCN- and TRPM-like channels are essential for pacemaker activity in *Hydra***

5 We next tested the role of the neuronal subpopulation N2-specific ANO1-, SCN- and TRPM-like  
6 channels in controlling the pacemaker-driven rhythmic spontaneous contractions in *Hydra*  
7 (Fig. 2o–q). Exposing polyps to Ani9, a potent inhibitor of ANO1 channels<sup>32</sup>, resulted in both a  
8 two-fold reduction of the contraction frequency (Fig. 2q, r) and also in less regular contractions  
9 compared to controls (Fig. 2s). Similar results were obtained upon treatment of polyps with  
10 menthol, which activates TRPM8 channels in vertebrates<sup>33</sup>, and lidocaine, which interferes with  
11 SCN-like ion channels (Fig. 2q–s). The results show that modulating the activity of the neuron-  
12 specific ANO1-, SCN- and TRPM-like channels in *Hydra* greatly disturbs the rhythmicity of  
13 spontaneous contractions. Since neuronal subpopulation N2 is also characterized by the  
14 expression of putative nAChRs (Fig. 1g, Extended Data Fig. 3), we next tested the effects of  
15 tubocurarine (DTC), known as potent antagonist of nAChRs<sup>34,35</sup>, on the frequency and  
16 rhythmicity of the spontaneous contractions in *Hydra* (Fig. 2q). We found that the presence of  
17 DTC strongly reduced the frequency and affected the regularity of the spontaneous contractions  
18 (Fig. 2r, s). Other reflexes dependent on neural circuits such as the feeding reflex<sup>36</sup> were not  
19 affected by most of the channel-specific inhibitors (Extended Data Fig. 12) indicating a specific  
20 role of the ion channels expressed in the N2 neurons in controlling rhythmic body contractions.  
21 Inhibiting GABA<sub>A</sub> receptors specifically expressed in neurons of subpopulation N7 and absent in  
22 the subpopulation N2 (Fig. 1g, Fig. 2q, Extended Data Fig. 3) had no effect onto the contraction  
23 pattern (Fig. 2r,s) but strongly influenced the feeding response (Extended Data Fig. 12).  
24 Together with the previous pharmacological findings<sup>36</sup>, our observations unequivocally identify

1 the pacemaker population N2 as cholinergic, and the neuronal population N7 controlling the  
2 feeding response as predominantly GABAergic. Notably, all cells within neuronal population N2  
3 homogeneously expressed high levels of one of the *innexin* genes – *cluster41630* (Extended Data  
4 Fig. 13). Innexins are the only components of gap junction complexes known in *Hydra*<sup>37,38</sup>.  
5 Homotypic gap junctions established between neurons of the N2 subpopulation therefore may  
6 electrically couple these neurons and allow generation of a neural network with pacemaker  
7 properties. In a similar way, a net of neurons present in the peduncle of *Hydra* is likely coupled  
8 by gap junctions<sup>39</sup>, and the epithelial cells of the bot, ectoderm and endoderm, are electrically  
9 coupled by gap junctions<sup>40–42</sup>. In sum, these data suggest that neurons of the N2 subpopulation  
10 express marker genes for gut dysmotility (Fig. 2a–n) and that inhibition of these ion channels  
11 disturbs spontaneous and regular body contractions (Fig. 2o–s). Therefore, neurons of the N2  
12 subpopulation may act as pacemaker cells controlling the spontaneous contraction pattern. This  
13 is consistent with earlier electrophysiological recordings in *Hydra*<sup>29</sup> and the observations that  
14 removal of the head region results in loss of spontaneous contractile activity<sup>27</sup>.

### 16 **Pacemaker neurons in *Hydra* are immunocompetent cells**

17 We have shown previously that neurons in *Hydra* secrete antimicrobial peptides to shape the  
18 resident microbiome<sup>43</sup>. Neurons express a rich repertoire of peptides including the previously  
19 characterized antimicrobial peptide NDA1 and the dual-function neuropeptides RFamide III,  
20 Hym-370 and Hym-357 which previously were found to have strong activity against Gram-  
21 positive bacteria<sup>43</sup> (Fig. 3a). In addition, neurons express homologs of Kazal2 and Arminin  
22 proteins that have been previously characterized<sup>44–46</sup> as antimicrobial peptides in epithelial or  
23 gland cells in *Hydra* (Fig. 3a). Notably, the N2 pacemaker population also express multiple AMP  
24 molecules (Fig. 3a) indicating that these neurons, in addition to governing peristaltic motion, also



1 are directly interacting with the resident microbiota. To determine if interaction with bacteria is a  
2 general characteristic of neurons in *Hydra*, we analyzed the seven neuronal subpopulations for  
3 expression of immune-related genes (Fig. 3b–d). Neurons express virtually all components of the  
4 Toll-like receptor (TLR/MyD88) pathway<sup>47</sup> (Fig. 3b, Extended Data Fig. 14a) as well as many  
5 intracellular NACHT- and NB-ARC-domain containing NOD-like receptors<sup>48</sup> (Fig. 3c, Extended  
6 Data Fig. 14b) and also C-type lectin (CTL) receptors (Fig. 3c, Extended Data Fig. 14c). Overall,  
7 these observations indicate that neurons in *Hydra* are immunocompetent cells, equipped with  
8 receptors, signal transducers and effector molecules to interact with bacteria.

9 In addition to a conserved toolbox of immune genes (Fig. 3b–d), *Hydra* neurons also employ  
10 some of their non-conserved, taxonomically-restricted genes (TRGs) to interact with bacteria.  
11 Non-conserved genes comprise over 70% of the cell-type specific genes in transcriptomes of the  
12 seven neuronal subpopulations (N1–N7) (Fig. 3e, Extended Data Fig. 15, Supplementary Data 2).  
13 The majority of the neuron-specific TRGs code for short peptides (<200 aa) with a N-terminal  
14 signal peptide sequence, but with no detectable structural domains (Supplementary Data 2). A  
15 machine learning-based approach<sup>49</sup> identified that some of these novel genes code for putative  
16 peptides with high membrane destabilizing activity indicating strong antimicrobial activity  
17 (Extended Data Fig. 16, Supplementary Data 3). Surprisingly, the neuronal cluster N2 that  
18 contains the pacemakers was one of the populations most enriched in secreted peptides with  
19 putative antimicrobial activity (Extended Data Fig. 16). To provide direct evidence for functional  
20 relevance of TRGs in immune reactions in neurons, we characterized TRG *cluster62692* that is  
21 specifically expressed in neuronal subpopulation N7 in the tentacles (Fig. 3f–h) and encodes a  
22 185 amino acid long peptide (Fig. 3i). The N-terminal signaling peptide is followed by a stretch  
23 of mostly positively-charged residues which is predicted to have a high membrane destabilizing  
24 activity (Fig. 3i). Screening a *Hydra* peptide database<sup>50</sup> uncovered a 17 aa amidated peptide

1 referred to as Hym-121 that is identical to aa 47-63 within the *cluster62692* polypeptide (Fig. 3i),  
2 thus providing an evidence for translation and proteolytic processing of the preprohormone  
3 encoded by TRG *cluster62692*. To test whether this peptide may serve as an antimicrobial  
4 peptide, we synthesized the amidated aa 47-63 peptide and subjected it to MIC assay against  
5 diverse bacteria. We found the peptide to inhibit growth of *Escherichia coli* at concentrations as  
6 low as 0.2  $\mu\text{M}$  (Fig. 3j, k). The peptide also displayed a strong growth inhibiting activity (MIC  
7 1.5  $\mu\text{M}$ ) against *Acidovorax* - a Gram-negative commensal microbe found on *Hydra*<sup>51</sup>. The  
8 growth of other two resident microbes, *Curvibacter* and *Duganella*, was impaired only at peptide  
9 concentrations 12.5-25  $\mu\text{M}$ . Finally, the growth of *Undibacterium* was not inhibited by the 47-63  
10 peptide even at 100  $\mu\text{M}$ , indicating a high selectivity of the peptide's antimicrobial activity  
11 (Fig. 3j). Surprisingly, while the peptide did not inhibit the growth of *Bacillus megaterium*, it  
12 drastically affected the colony morphology at concentrations as low as 6.3  $\mu\text{M}$  (Fig. 3j, k). This  
13 suggests that the peptide modulates the motility, swarming behavior or spore formation of  
14 *B. megaterium*, implying thus a novel mechanism of AMP activity. Taken together, our data  
15 suggest that in addition to a conserved toolbox of immune genes (Fig. 3b-d), neurons also  
16 employ some of their TRGs to interact with bacteria supporting the view<sup>52</sup> that the nervous  
17 system, with its rich repertoire of neuropeptides, is involved in controlling resident beneficial  
18 microbes.

### 20 **Murine intestinal pacemaker cells also are immunocompetent cells**

21 To search for commonalities between *Hydra* and mice pacemaker neurons, we screened the  
22 transcriptome of murine intestinal pacemakers, the interstitial cells of Cajal (ICCs)<sup>15</sup> for the  
23 presence of transcripts coding for immune receptors and pathways. Surprisingly, almost the  
24 entire signal-transducing cascade of the TLR/MyD88 pathway is present in the ICCs (Extended

1 Data Fig. 17, Supplementary Data 4). ICCs also express antimicrobial peptides such as Defensin-  
2 8 (Supplementary Data 3) as well as components of the NLR- and CTL- pathways including  
3 NOD1, NOD2, and multiple CTL-domain receptors which are essential for detecting bacterial  
4 (Extended Data Fig. 18 and 19, Supplementary Data 4). This strongly suggests that ICCs in  
5 mice, similar to pacemaker neurons resident in subpopulation N2 in *Hydra*, are capable of  
6 interacting with bacteria and that, therefore, the molecular architecture of pacemaker cells is  
7 highly conserved in evolution (Fig. 4).

8

## 9 **Conclusions**

10 We have generated a comprehensive molecular profile of the neural subpopulations in *Hydra* and  
11 proposed a novel conceptual framework for phenotypic diversification of one of the simplest  
12 nervous systems in the animal kingdom. This framework builds upon seven spatially and  
13 functionally segregated neural subpopulations allowing for the emergence of diverse and  
14 complex behaviors within a morphologically simple nerve net structure.

15 Our data establish the neurons of the N2 population as a major contributor to controlling the  
16 rhythmicity of spontaneous body contractions in *Hydra*. These prototypical pacemaker cells  
17 reside in the head region and specifically express ANO1, SCN5 and TRPM-like ion channels  
18 that characterize human gut pacemakers. Consistently, the experimental inhibition of these  
19 channels greatly disturbs peristalsis in *Hydra*, which is consistent with our finding that these  
20 neurons are coupled by gap junctions into a network exhibiting pacemaker activity. The high  
21 degree of gene expression program conservation between the *Hydra* pacemaker subpopulation  
22 N2 and murine pacemaker cells supports that peristaltic motor activity of the gut is an  
23 evolutionary ancient archetypical property necessary to sustain life<sup>53,54</sup>, and that the cells with

1 recurrent spontaneous electric activity have evidently emerged as early as the nervous system  
2 itself.

3 Finally, we discovered that *Hydra* pacemaker cells express a rich set of immune genes including  
4 antimicrobial peptides providing a mechanism for direct interference with resident microbes. The  
5 finding that many neuron-specific novel genes also encode antimicrobial peptides underlines the  
6 important function of neurons in interacting with microbes. Experimental interfering with  
7 microbiome in *Hydra*<sup>26</sup> and disturbances of gut microbiota in humans<sup>55-57</sup> similarly result in  
8 changes in pacemaker rhythmicity and abnormal peristalsis. Because the *Hydra* pacemaker  
9 neurons can directly mediate the interaction with microbiome, it might be plausible that human  
10 pacemakers in the gut similarly communicate with microbial communities. In fact, emerging data  
11 on mice provide first evidence for direct interactions between the gut microbiota, enteric neurons  
12 and the intestinal motility<sup>58,59</sup>. The evolutionary similarity or dissimilarity of the molecular  
13 toolkit used for such communication should become a subject of further investigations.

14 Altogether, our discoveries will improve the understanding of the archetypical properties of net  
15 nerve systems with pacemakers including human enteric nervous system, which is perturbed in  
16 human dysmotility-related conditions affecting a large portion of the general population  
17 worldwide. We therefore presume that the principles identified here are relevant far beyond  
18 *Hydra*.

19

## 20 **Methods**

### 21 **Experimental design**

22 Experiments were carried out using *Hydra vulgaris* strain AEP. Animals were maintained  
23 under constant conditions including the culture medium, food, and temperature (18°C) according

1 to standard procedures<sup>60</sup>. Experimental animals were chosen randomly from clonally growing  
2 asexual *Hydra* cultures. The animals were typically fed three times a week, however they were  
3 not fed for 24 h prior to prior to pharmacological interference experiments, or for 48 h prior to  
4 RNA isolation, immunohistochemical staining and *in situ* hybridization.

### 5 **Generation of transgenic *Hydra* strains**

6 To facilitate the FACS-mediated molecular profiling of single cells, we developed a  
7 transgenic *Hydra* line in which expressing two reporter proteins. The enhanced green fluorescent  
8 protein (eGFP) was cloned downstream from the previously reported *cnnos1* promoter<sup>61</sup> and  
9 flanked by the actin terminator from the 3'-end. The second reporter, codon-optimized DsRED2  
10 protein, was driven by the *actin* promoter sequence and flanked by the *actin* terminator region.  
11 This double cassette was cloned into the LigAF vector<sup>62</sup>. The transgenic construct was  
12 propagated in the *Escherichia coli* DH5-alpha strain and microinjected into fertilized embryos of  
13 *H. vulgaris* strain AEP as previously described<sup>60,62</sup>. Initial founder mosaic transgenic animals  
14 were clonally propagated, screened and enriched for transgenic cells until all interstitial stem  
15 cells were transgenic. The transgenic animals show no developmental abnormalities and are  
16 maintained in the lab for over 5 years.

### 17 **FACS isolation of cells**

18 To isolate cells of the interstitial stem cell lineage from the transgenic *Hydra* by FACS  
19 (Extended Data Fig. 1a), the polyps were disintegrated into a cell suspension as previously  
20 described<sup>61</sup>. Briefly, 100 hydras were treated for 1.5 h in 1 ml dissociation medium (KCl 3.6  
21 mM, CaCl<sub>2</sub> 6.0 mM, MgSO<sub>4</sub> 1.2 mM, Na citrate 6.0 mM, Na pyruvate 6.0 mM, TES 12.54 mM,  
22 glucose 6.0 mM, pH 6.9) supplemented with 50 U/mL Pronase E (Serva, Cat. No. 33635) on an  
23 orbital shaker at 200 rpm at 18°C. The resulting cell suspension was filtered through a 100 µm  
24 mesh to eliminate remaining tissue clumps and centrifuged for 5 min at 1,000 g at 4°C, the

1 supernatant was removed, and the cells were resuspended in 1.0 mL cold dissociation medium.  
2 Single-cell suspensions were sorted according to FSC, SSC, eGFP and RFP fluorescence using  
3 FacsAria II cell sorting system (BD Biosciences, San Jose, CA, USA) utilizing the 100  $\mu$ m  
4 nozzle and sheath pressure 20 PSI at 4°C. Gating was performed first using FSC and SSC to  
5 eliminate cell debris and doublets, and then the singlets were gated by the intensity of green and  
6 red fluorescent signals. First, a small sample was collected in the “bulk-sort” mode, checked  
7 microscopically using phase contrast and fluorescent microscopy with eGFP and RFP filter sets,  
8 and re-analyzed to verify purity of sorted fractions. In all cases, purity of the collected cell  
9 populations exceeded 95%. Further, single cells were sorted directly into 382-well plates  
10 containing 2.0  $\mu$ L of lysis buffer supplemented with Triton X-100 and RNase inhibitor, 1.0  $\mu$ L  
11 oligo-dT30VN primer and 1.0  $\mu$ L dNTP mix per well. Immediately after FACS isolation, sorted  
12 cells were centrifuged at 700 g for 1 min, and snap frozen on dry ice. In total, 1152 individual  
13 cells were harvested: 384 GFP<sup>-</sup>/RFP<sup>+</sup> neurons, 384 GFP<sup>+</sup>/RFP<sup>-</sup> stem cells, and 384  
14 GFP<sup>low</sup>/RFP<sup>low</sup> cells.

### 15 **Smart-seq2 library preparation and scRNA-sequencing**

16 To generate cDNA libraries from the isolated cells, previously described Smart-seq2  
17 protocol<sup>63</sup> was implemented with minor modifications. After RNA denaturation at 72°C for 3  
18 min and reverse transcription reaction, 22 cycles of pre-amplification were carried out using IS  
19 PCR primers. PCR products were purified on Ampure XP beads and the quality of cDNA  
20 libraries was assessed on an Agilent high-sensitivity DNA chip. A successful library had an  
21 average size of 1 kb. After tagmentation using Illumina Nextera XT DNA kit and amplification  
22 of adapter-ligated fragments using index N5xx and N7xx primers for 12 cycles, the PCR  
23 fragments were again purified, their concentration and size distribution were estimated using  
24 Qubit and Agilent chips, respectively. The libraries were further diluted to 2 nM, pooled, and

1 paired-end sequenced on Illumina HiSeq2500 instrument. Raw sequences and quality scores for  
2 all clusters were extracted using CASAVA software.

### 3 **Reference transcriptome and gene annotation**

4 A reference transcriptome of *H. vulgaris* strain AEP (accession number SRP133389) was  
5 assembled from 25 cDNA libraries generated from whole non-transgenic polyps at different  
6 conditions sequenced using Illumina HiSeq2500 v4 platform and annotated as previously  
7 described<sup>64</sup>. To generate the subsets of putative neurotransmitter receptors, ion channels and  
8 transcription factors, we used SMART, Pfam domain and PANTHER family predictions  
9 generated by InterProScan. To generate the proliferation signature dataset for cell type  
10 annotation, we identified in *Hydra* homologues of 25 highly conserved genes coding for proteins  
11 involved in cell division control and collectively known as “proliferation gene expression  
12 signature”<sup>65</sup> using BLAST (Supplementary Data 5). To get a deeper insight into the top 300  
13 genes differentially expressed in each of 12 clusters, we performed additional annotation steps.  
14 First, we performed BLAST analysis of the longest detected ORF predicted within each  
15 transcript using BLAST+ tool. Initially, BLAST was performed for all the differentially  
16 expressed transcripts from each cluster, using Uniprot database. A more precise BLAST search  
17 was then performed on the top 300 DE genes from each cluster, using NCBI nr Refseq database.  
18 Further, in order to detect TRGs among the DE genes, the BLAST search was performed first  
19 using the whole RefSeq database, and then with Cnidarian taxon (taxid 6073) excluded. A gene  
20 was considered as TRG if e-value from BLAST without cnidarian taxon is higher than 10e-10  
21 and e-value from BLAST with cnidarian taxon is lower than 10e-10. Further, to predict the  
22 function of the putative gene products, we screened the predicted peptide sequences for the  
23 presence of signal peptides using SignalP<sup>66</sup>, the distribution of positively and negatively charged  
24 amino acids as well as putative strand, coiled or helical domains using GOR IV<sup>67</sup> and inferred

1 putative cellular localization using DeepLoc<sup>68</sup>. The sequences were also screened for the  
2 presence of putative structural domains using SMART<sup>69</sup>. Finally, to test, whether the peptides  
3 encoded within TRGs may possess properties of putative AMPs, the sequences were scanned for  
4 probability of having membrane disruption activity ( $\sigma$ -score) using a machine learning  
5 classifier<sup>49</sup> with a moving window of 20 amino acids. The prediction scores are based on the  
6 support vector machine (SVM) distance to margin score,  $\sigma$ . Peptides with the membrane activity  
7 score  $\sigma > 0.0$  were considered as putative AMPs, and peptides with  $\sigma > 1.0$  – as high-confidence  
8 AMPs. To refine the prediction of an active peptide encoded within the TRG *cluster62692*  
9 precursor, we repeated the membrane activity scanning for this precursor using moving windows  
10 10 to 30 aa. The results of prediction were visualized using heat maps. Supplementary Data 3  
11 provides a list of all the TRGs screened using this machine learning tool with corresponding  $\sigma$ -  
12 score values.

### 13 **scRNA-seq data processing and quality control**

14 Raw data from scRNA-seq were processed using a snakemake single cell RNA-seq pipeline  
15 in transcriptome mode. Briefly, data was mapped to the *H. vulgaris* transcriptome<sup>64</sup> using STAR  
16 v2.5.2b<sup>70</sup> with stringent gap penalties (*i.e.* outFilterMultimapNmax 100, alignIntronMax 1,  
17 alignIntronMin 2, scoreDelOpen -1000, scoreInsOpen -10000). Quality control was performed  
18 with the RSeQC package<sup>71</sup> and gene expression was estimated with RSEM<sup>72</sup> with groups of  
19 contigs (called clusters) defined as genes as previously described<sup>64</sup>. Low quality cells were  
20 filtered according to the following criteria: < 20% uniquely mapping reads, > 26.2% ERCC  
21 spike-in mapping, >68.7% rRNA mapping, >13.9% of the reads at the 10% most 3' end of  
22 transcripts (using only transcripts with complete ORFs) and < 3,000 genes detected, < 798,442  
23 counts mapped. Any cell that failed two of these criteria was removed from the analysis.

### 24 **scRNA-seq analysis**



1           Cells passing quality control (*i.e.* 1,016) were analyzed using the R package Seurat\_2.3.4.  
2           We used specific parameters for the different input gene sets. Input genes for each gene set are in  
3           Supplementary Data 1, 7 and 8.

#### 4           **Whole transcriptome**

5           We included genes detected in at least 3 cells and cells that contained at least 5,000  
6           transcripts. This resulted in a total of 928 cells and 166,186 transcripts. Subsequently, we  
7           performed normalization using the option “LogNormalize” with scale.factor the mean number of  
8           genes per cell. We selected a total of 6,549 variable genes (x.low.cutoff=0.5, x.high.cutoff=50,  
9           y.cutoff=0.5) and identified cell clusters using 20 PCA dimensions and a resolution parameter  
10          equal to 0.6.

#### 11          **Receptors**

12          We included genes detected in at least 1 cells and cells that contained at least 1 transcript in  
13          order to include all receptor genes. This resulted in a total of 926 cells and 112 transcripts  
14          (Supplementary Data 7). Subsequently, we performed normalization using the option  
15          “LogNormalize” with scale.factor the mean number of genes per cell. We used the 112 receptor  
16          genes as variable genes (x.low.cutoff=0, x.high.cutoff=7, y.cutoff=-2) and identified cell clusters  
17          using 6 PCA dimensions and a resolution parameter equal to 0.6.

#### 18          **Ion channels**

19          We included genes detected in at least 2 cells and cells that contained at least 2 transcripts  
20          in order to include all ion channel genes. This resulted in a total of 928 cells and 431 transcripts  
21          (Supplementary Data 8). Subsequently, we performed normalization using the option  
22          “LogNormalize” with scale.factor the mean number of genes per cell. We used the 431 ion  
23          channel genes as variable genes (x.low.cutoff=0, x.high.cutoff=50, y.cutoff=-3) and identified  
24          cell clusters using 15 PCA dimensions and a resolution parameter equal to 0.6.

## 1 **Transcription factors**

2 We included genes detected in at least 1 cells and cells that contained at least 1 transcript in  
3 order to include all transcription factor genes. This resulted in a total of 928 cells and 364  
4 transcripts (Supplementary Data 1). Subsequently, we performed normalization using the option  
5 “LogNormalize” with scale.factor the mean number of genes per cell. We used the 364 ion  
6 channel genes as variable genes (x.low.cutoff=0, x.high.cutoff=7, y.cutoff=-3) and identified cell  
7 clusters using 5 PCA dimensions and a resolution parameter equal to 0.6.

## 8 **Hierarchical clustering**

9 The input data was TPM normalized in RSEM and subset for the corresponding input cells  
10 and genes that underwent dimensionality reduction. A +1 pseudocount was added prior to log2  
11 transformation. Heatmaps were generated in R using the heatmap.2 function based on Euclidean  
12 distances and the ward.D2 method.

## 13 ***In situ* hybridization**

14 To map the seven neuronal clusters populations in the *Hydra* body, we performed *in situ*  
15 hybridization with a set of genes strongly enriched in either of the seven neuronal  
16 subpopulations. Expression patterns were detected in the whole mount *Hydra* preparations by *in*  
17 *situ* hybridization with an anti-sense digoxigenin-labeled RNA probes as previously described<sup>73</sup>.  
18 DIG-labeled sense-probe was used as a control. Signal was developed using anti-DIG antibodies  
19 conjugated to alkaline phosphatase (1:2000, Roche) and NBT/BCIP staining solution (Roche).  
20 Images of the *in situ* preparations were captured on a Zeiss Axioscope with Axiocam camera.

## 21 **Pharmacological interference assays**

22 To investigate the role of specific ANO1-, SCN- and TRPM-like channels in the pacemaker  
23 activity in *Hydra*, we exposed normal *H. vulgaris* AEP polyps to different pharmacological  
24 agents, recorded and quantified their behavior. Polyps were treated with 25  $\mu$ M Ani9 (Sigma,

1 Cat. No. SML1813), 200  $\mu$ M menthol (Sigma, Cat. No. 15785), 100  $\mu$ M lidocaine (Sigma, Cat.  
2 No. L5647), 1 mM tubocurarine (DTC, Sigma, Cat. No. 93750) or 100  $\mu$ M muscimol (Sigma,  
3 Cat. No.M1523) for 1 or 12 hours at 18°C. Control polyps were incubated either in Hydra-  
4 medium or in the medium supplemented with 0.16% DMSO (for Ani9, which has been dissolved  
5 in 100% DMSO to stock concentration 15 mM). The spontaneous contractions were video-  
6 recorded and quantified as previously described<sup>26</sup>. We recorded the behavior for 90 min with a  
7 frequency 20 frames per minute. For further analysis, we excluded first 30 min of the recorded  
8 sequence, and quantified number of full body contractions and their periodicity using a custom  
9 ImageJ plugin<sup>26</sup>. The contraction frequencies were normalized to the average frequency of  
10 contractions in corresponding control polyps. To examine the effects of the modulators on the  
11 feeding reflex, *Hydra* polyps were pretreated with the pharmacological agents, their feeding  
12 reflex was elicited by 10  $\mu$ M reduced glutathione (GSH, Sigma, Cat. No. G4251), and the  
13 duration of feeding response was recorded as described by Lenhoff<sup>74</sup>.

#### 14 **Statistical analysis**

15 The sample size ( $n$ ) reported in the figure legends is the total amount of animals used in  
16 each treatment. Each animal employed was assigned to only one treatment and was recorded  
17 only once. Treatment of the polyps with pharmacological substances and evaluation of the  
18 behavioral parameters (contraction frequency, intervals between contractions, and duration of  
19 feeding response) was blinded. Differences in contraction frequency, interval between  
20 contractions, and feeding response duration between the treatments (*i.e.* Ani9, lidocaine,  
21 menthol, DTC, and muscimol) and corresponding control (*i.e.* Hydra-medium or DMSO) were  
22 analyzed using unpaired  $t$ -test.

#### 23 **MIC determination of antimicrobial activity**

1 To test whether peptides encoded in TRGs may have an antimicrobial function, two 17 aa  
2 long peptides corresponding to aa 47-63 (SPPWNKFGAFVKSKLAK) and aa 59-75  
3 (SKLAKSKREMSNSDGSE) of the prepropeptides encoded by the *cluster62692* were  
4 synthesized (up to 5 mg), C-terminally amidated and purified to a purity of > 95% (GenScript,  
5 USA), and their antimicrobial activity was estimated in a Minimum Inhibitory Concentration  
6 (MIC) assay as previously described<sup>43</sup>. The following bacterial strains were used in MIC assays:  
7 *Bacillus megaterium* ATCC14581, *Escherichia coli* D31, and four isolates from the natural *H.*  
8 *vulgaris* strain AEP microbiota: *Curvibacter* sp., *Duganella* sp., *Acidovorax* sp., and  
9 *Undibacterium* sp.<sup>46,75</sup>. Microdilution susceptibility assays were carried out in 96-well microtiter  
10 plates that were pre-coated with sterile 0.1% bovine serum albumin (BSA). After removal of  
11 BSA the wells were filled with a twofold dilution series of either aa 47-63 or aa 59-75 peptide.  
12 We also tested the neuropeptides Hym-370 (KPNAYKKGKLPGLW-amide) and Hym-357  
13 (KPAFLFKGYKP-amide) that has been previously identified as putative antimicrobial  
14 substances<sup>43</sup>. Lyophilized peptides were dissolved in ultrapure water to stock concentration of  
15 10 mg/mL. Incubation with an inoculum of approximately 100 CFU per well was performed in  
16 PBS buffer (pH 6.2) overnight at 37 °C for *B. megaterium* and *E. coli*, or in R2A media for 3-4  
17 days at 18°C for four isolates of *Hydra* bacteria. The MIC was determined as the lowest serial  
18 dilution showing absence of a bacterial cell pellet. Experiments were carried out in triplicates.

### 19 **Phylogenetic analysis of ion channel genes**

20 To uncover, whether *Hydra* has homologues of the ion channel genes whose expression is  
21 known to be either restricted to mammalian ICCs or essential for gut motility, we performed a  
22 BLAST search (tblastn) using full-length amino acid sequences of ANO1 (UniProt accession  
23 number Q5XXA6), SCN5A (accession number Q14524) and TRPM8 (accession number  
24 Q7Z2W7) proteins from *Homo sapiens* against the genome of *H. vulgaris*<sup>38</sup> (available at

1 <https://research.nhgri.nih.gov/hydra/>) and the reference transcriptome of *H. vulgaris* strain AEP  
2 (SRA accession SRP133389). Matches with expectation e-value <10e-10 were considered as  
3 signs of homolog presence and were verified by manual domain composition analysis using  
4 SMART<sup>69</sup>, transmembrane domain prediction with TMHMM<sup>76</sup> and reciprocal BLAST against  
5 the UniProt database. Maximum-likelihood phylogenetic trees of ANO1, SCN5A and TRPM8  
6 homologs from *Hydra*, human, African clawed frog *Xenopus laevis*, and zebrafish *Danio rerio*  
7 were built using full-length amino acid sequences aligned using MUSCLE<sup>77</sup> with 1000 bootstrap  
8 iterations.

### 9 **Quantitative real-time PCR gene expression analysis**

10 To test, whether the genes coding for ANO1, SCN5A and TRPM8 homologues in *Hydra*  
11 are differentially expressed in the polyp along the oral-aboral axis, we performed quantitative  
12 real-time PCR. We dissected polyps into three body sections: head (hypostome area with  
13 tentacles), body column, and foot (peduncle). Each total RNA was extracted from body  
14 fragments obtained from 50 polyps, and converted into the cDNA as previously described<sup>78</sup>.  
15 Real-time PCR was performed using GoTaq qPCR Master Mix (Promega, USA) and  
16 oligonucleotide primers specifically designed to amplify the homologues of ANO1, SCN5A and  
17 TRPM8 ion channel genes, as well as the *ef1a* (translation elongation factor 1 alpha) and *actin*  
18 genes as equilibration references (Supplementary Table 1). For each body part, we made 3-5  
19 biological replicates. The data were collected by ABI 7300 Real-Time PCR System (Applied  
20 Biosystems, USA) and analyzed by the conventional  $\Delta\Delta C_t$  method.

### 21 **Generation of antibodies and immunohistochemistry**

22 To localize the expression of ANO1-like and SCN5A-like ion channels in *Hydra* using  
23 immunocytochemistry, polyclonal antibodies were raised against synthetic peptides in rabbits.  
24 The peptides that correspond to intracellular loops located between transmembrane domains of

1 the ion channels (hySCN5-like: SRSKPKMFKDYKPE; hyANO-like: ETRRPIADRAQD) were  
2 synthesized, purified and N-terminally conjugated with KLH prior to injection (GenScript, USA).  
3 Polyclonal antibodies were affinity purified on the antigen and concentrated to 1.5 mg/mL.  
4 Serum harvested from the rabbits prior to their immunization was used as control.

5 Immunohistochemical detection in whole mount *Hydra* preparations was carried out as  
6 described previously<sup>73</sup>. Briefly, polyps were relaxed in 2% urethane in Hydra-medium, fixed in  
7 4% (v/v) paraformaldehyde, washed with 0.1% Tween in PBS, permeabilized with 0.5% Triton  
8 X-100 in PBS, incubated in blocking solution (1% BSA, 0.1% Tween in PBS) for 1 h and  
9 incubated further with primary antibodies diluted to 1.0 µg/mL in blocking solution at 4°C.  
10 AlexaFluor488-conjugated goat-anti-rabbit antibodies (Invitrogen, USA) were diluted to  
11 4 µg/mL in blocking buffer and incubations were done for 1 h at room temperature. Rhodamin-  
12 phalloidin (Sigma) and TO-PRO3-iodide-AlexFluor633 (Invitrogen, USA) counterstaining was  
13 conducted as described previously<sup>73</sup>. Confocal laser scanning microscopy was done using a TCS  
14 SP1 laser scanning confocal microscope (Leica, Germany).

15

1  
2  
3  
4  
5  
6  
7  
8  
9  
10  
11  
12  
13  
14  
15  
16  
17  
18  
19  
20  
21  
22

## References

1. Sasselli, V., Pachnis, V. & Burns, A. J. The enteric nervous system. *Dev. Biol.* **366**, 64–73 (2012).
2. Bosch, T. C. G. *et al.* Back to the basics: cnidarians start to fire. *Trends Neurosci.* **40**, 92–105 (2017).
3. Olsson, C. & Holmgren, S. The control of gut motility. *Comp. Biochem. Physiol. Part A Mol. Integr. Physiol.* **128**, 479–501 (2001).
4. Barajas-Lopez, C., Berezin, I., Daniel, E. E. & Huizinga, J. D. Pacemaker activity recorded in interstitial cells of Cajal of the gastrointestinal tract. *Am. J. Physiol. - Cell Physiol.* **257**, C830 LP-C835 (1989).
5. Sanders, K. M., Ward, S. M. & Koh, S. D. Interstitial cells: regulators of smooth muscle function. *Physiol. Rev.* **94**, 859–907 (2014).
6. Thomson, L. *et al.* Interstitial cells of Cajal generate a rhythmic pacemaker current. *Nat. Med.* **4**, 848–851 (1998).
7. Farrugia, G. Interstitial cells of Cajal in health and disease. *Neurogastroenterol. Motil.* **20**, 54–63 (2008).
8. Huizinga, J. D. *et al.* W/kit gene required for interstitial cells of Cajal and for intestinal pacemaker activity. *Nature* **373**, 347–349 (1995).
9. Yamataka, A. *et al.* A lack of intestinal pacemaker (c-kit) in aganglionic bowel of patients with Hirschsprung’s disease. *J. Pediatr. Surg.* **30**, 441–444 (1995).
10. Cogliandro, R. F. *et al.* Patient-reported outcomes and gut dysmotility in functional

- 1           gastrointestinal disorders. *Neurogastroenterol. Motil.* **23**, 1084–1091 (2011).
- 2       11. De Giorgio, R., Sarnelli, G., Corinaldesi, R. & Stanghellini, V. Advances in our  
3           understanding of the pathology of chronic intestinal pseudo-obstruction. *Gut* **53**, 1549 LP  
4           – 1552 (2004).
- 5       12. Kellow, J. E., Phillips, S. F., Miller, L. J. & Zinsmeister, A. R. Dysmotility of the small  
6           intestine in irritable bowel syndrome. *Gut* **29**, 1236 LP – 1243 (1988).
- 7       13. Gomez-Pinilla, P. J. *et al.* Ano1 is a selective marker of interstitial cells of Cajal in the  
8           human and mouse gastrointestinal tract. *Am. J. Physiol. Liver Physiol.* **296**, G1370–G1381  
9           (2009).
- 10      14. Strege, P. R. *et al.* Sodium current in human intestinal interstitial cells of Cajal. *Am. J.*  
11           *Physiol. Liver Physiol.* **285**, G1111–G1121 (2003).
- 12      15. Lee, M. Y. *et al.* Transcriptome of interstitial cells of Cajal reveals unique and selective  
13           gene signatures. *PLoS One* **12**, e0176031 (2017).
- 14      16. Beyder, A. *et al.* Loss-of-function of the Voltage-gated Sodium Channel NaV1.5  
15           (Channelopathies) in Patients with Irritable Bowel Syndrome. *Gastroenterology* **146**,  
16           1659–1668 (2014).
- 17      17. Strege, P. R. *et al.* Irritable bowel syndrome (IBS) patients have SCN5A channelopathies  
18           that lead to decreased NaV1.5 current and mechanosensitivity. *Am. J. Physiol. Liver*  
19           *Physiol.* (2017).
- 20      18. Mazzone, A. *et al.* Direct repression of anoctamin 1 (ANO1) gene transcription by Gli  
21           proteins. *FASEB J.* fj-201802373R (2019).
- 22      19. Beyder, A. & Farrugia, G. Ion channelopathies in functional GI disorders. *Am. J. Physiol.*



- 1            *Liver Physiol.* **311**, G581–G586 (2016).
- 2            20. Henström, M. *et al.* TRPM8 polymorphisms associated with increased risk of IBS-C and  
3            IBS-M. *Gut* gutjnl-2016 (2016).
- 4            21. Ek, W. E. *et al.* Exploring the genetics of irritable bowel syndrome: a GWA study in the  
5            general population and replication in multinational case-control cohorts. *Gut* gutjnl-2014  
6            (2014).
- 7            22. Bonfiglio, F. *et al.* A GWAS meta-analysis from 5 population-based cohorts implicates  
8            ion channel genes in the pathogenesis of irritable bowel syndrome. *Neurogastroenterol.*  
9            *Motil.* **30**, e13358 (2018).
- 10           23. Bonfiglio, F. *et al.* Female-Specific Association Between Variants on Chromosome 9 and  
11           Self-Reported Diagnosis of Irritable Bowel Syndrome. *Gastroenterology* **155**, 168–179  
12           (2018).
- 13           24. Wiles, T. J. *et al.* Host gut motility promotes competitive exclusion within a model  
14           intestinal microbiota. *PLoS Biol.* **14**, e1002517 (2016).
- 15           25. Campbell, R. D., Josephson, R. K., Schwab, W. E. & Rushforth, N. B. Excitability of  
16           nerve-free hydra. *Nature* **262**, 388–390 (1976).
- 17           26. Murillo-Rincon, A. P. *et al.* Spontaneous body contractions are modulated by the  
18           microbiome of Hydra. *Sci. Rep.* **7**, 15937 (2017).
- 19           27. Passano, L. M. & McCullough, C. B. Co-ordinating systems and behaviour in Hydra: I.  
20           Pacemaker system of the periodic contractions. *J. Exp. Biol.* **41**, 643–664 (1964).
- 21           28. Passano, L. M. & McCullough, C. B. Pacemaker hierarchies controlling the behaviour of  
22           hydras. *Nature* (1963).

- 1        29.    Kass-Simon, G. Longitudinal conduction of contraction burst pulses from hypostomal  
2            excitation loci in *Hydra attenuata*. *J. Comp. Physiol.* **80**, 29–49 (1972).
- 3        30.    Siebert, S. *et al.* Stem cell differentiation trajectories in *Hydra* resolved at single-cell  
4            resolution. *Science* (80-. ). **365**, eaav9314 (2019).
- 5        31.    Amato, A., Liotta, R. & Mulè, F. Effects of menthol on circular smooth muscle of human  
6            colon: analysis of the mechanism of action. *Eur. J. Pharmacol.* **740**, 295–301 (2014).
- 7        32.    Seo, Y. *et al.* Ani9, a novel potent small-molecule ANO1 inhibitor with negligible effect  
8            on ANO2. *PLoS One* **11**, e0155771 (2016).
- 9        33.    Peier, A. M. *et al.* A TRP channel that senses cold stimuli and menthol. *Cell* **108**, 705–715  
10          (2002).
- 11       34.    Willcockson, I. U. *et al.* Orientation of d-tubocurarine in the muscle nicotinic  
12          acetylcholine receptor binding site. *J. Biol. Chem.* (2002).
- 13       35.    Karpen, J. W. & Hess, G. P. Acetylcholine receptor inhibition by d-tubocurarine involves  
14          both a competitive and a noncompetitive binding site as determined by stopped-flow  
15          measurements of receptor-controlled ion flux in membrane vesicles. *Biochemistry* **25**,  
16          1786–1792 (1986).
- 17       36.    Pierobon, P. Coordinated modulation of cellular signaling through ligand-gated ion  
18          channels in *Hydra vulgaris* (Cnidaria, Hydrozoa). *Int. J. Dev. Biol.* **56**, 551–565 (2012).
- 19       37.    Alexopoulos, H. *et al.* Evolution of gap junctions: the missing link? *Curr. Biol.* **14**, R879-  
20          80 (2004).
- 21       38.    Chapman, J. A. *et al.* The dynamic genome of *Hydra*. *Nature* **464**, 592–6 (2010).
- 22       39.    Takaku, Y. *et al.* Innexin gap junctions in nerve cells coordinate spontaneous contractile

- 1 behavior in Hydra polyps. *Sci. Rep.* **4**, (2014).
- 2 40. Hufnagel, L. & Kass-Simon, G. The ultrastructural basis for the electrical coordination  
3 between epithelia of Hydra. in *Coelenterate ecology and behavior* 695–704 (Springer,  
4 1976).
- 5 41. Fraser, S. E., Green, C. R., Bode, H. R. & Gilula, N. B. Selective disruption of gap  
6 junctional communication interferes with a patterning process in hydra. *Science* (80-. ).  
7 **237**, 49 LP – 55 (1987).
- 8 42. Hand, a R. & Gobel, S. The structural organization of the septate and gap junctions of  
9 Hydra. *J. Cell Biol.* **52**, 397–408 (1972).
- 10 43. Augustin, R. *et al.* A secreted antibacterial neuropeptide shapes the microbiome of Hydra.  
11 *Nat. Commun.* **8**, 698 (2017).
- 12 44. Augustin, R., Siebert, S. & Bosch, T. C. G. Identification of a kazal-type serine protease  
13 inhibitor with potent anti-staphylococcal activity as part of Hydra’s innate immune  
14 system. *Dev. Comp. Immunol.* **33**, 830–837 (2009).
- 15 45. Augustin, R. *et al.* Activity of the novel peptide arminin against multiresistant human  
16 pathogens shows the considerable potential of phylogenetically ancient organisms as drug  
17 sources. *Antimicrob. Agents Chemother.* **53**, 5245–5250 (2009).
- 18 46. Franzenburg, S. *et al.* Distinct antimicrobial peptide expression determines host species-  
19 specific bacterial associations. *Proc. Natl. Acad. Sci.* **110**, E3730–E3738 (2013).
- 20 47. Franzenburg, S. *et al.* MyD88-deficient Hydra reveal an ancient function of TLR signaling  
21 in sensing bacterial colonizers. *Proc. Natl. Acad. Sci.* **109**, 19374–19379 (2012).
- 22 48. Lange, C. *et al.* Defining the origins of the NOD-like receptor system at the base of

- 1 animal evolution. *Mol. Biol. Evol.* **28**, 1687–1702 (2010).
- 2 49. Lee, E. Y., Fulan, B. M., Wong, G. C. L. & Ferguson, A. L. Mapping membrane activity  
3 in undiscovered peptide sequence space using machine learning. *Proc. Natl. Acad. Sci.*  
4 201609893 (2016). doi:10.1073/pnas.1609893113
- 5 50. Fujisawa, T. Hydra peptide project 1993-2007. *Dev. Growth Differ.* **50 Suppl 1**, S257-68  
6 (2008).
- 7 51. Fraune, S. & Bosch, T. C. G. T. C. G. Long-term maintenance of species-specific bacterial  
8 microbiota in the basal metazoan Hydra. *Proc. Natl. Acad. Sci.* **2007**, (2007).
- 9 52. Klimovich, A. V & Bosch, T. C. G. Rethinking the Role of the Nervous System: Lessons  
10 From the Hydra Holobiont. *BioEssays* 1800060 (2018).
- 11 53. Huizinga, J. D. *et al.* The origin of segmentation motor activity in the intestine. *Nat.*  
12 *Commun.* **5**, 3326 (2014).
- 13 54. Spencer, N. J., Dinning, P. G., Brookes, S. J. & Costa, M. Insights into the mechanisms  
14 underlying colonic motor patterns. *J. Physiol.* **594**, 4099–4116 (2016).
- 15 55. Quigley, E. M. M. Microflora modulation of motility. *J. Neurogastroenterol. Motil.* **17**,  
16 140 (2011).
- 17 56. Dey, N. *et al.* Regulators of gut motility revealed by a gnotobiotic model of diet-  
18 microbiome interactions related to travel. *Cell* **163**, 95–107 (2015).
- 19 57. Ge, X. *et al.* Potential role of fecal microbiota from patients with slow transit constipation  
20 in the regulation of gastrointestinal motility. *Sci. Rep.* **7**, 441 (2017).
- 21 58. Obata, Y. *et al.* Neuronal programming by microbiota enables environmental regulation of  
22 intestinal motility. *bioRxiv* 579250 (2019). doi:<https://doi.org/10.1101/579250>

- 1       59.   Cryan, J. F. & Dinan, T. G. Mind-altering microorganisms: the impact of the gut  
2       microbiota on brain and behaviour. *Nat. Rev. Neurosci.* **13**, 701–712 (2012).
- 3       60.   Klimovich, A., Wittlieb, J. & Bosch, T. C. G. Transgenesis in Hydra to characterize gene  
4       function and visualize cell behavior. *Nat. Protoc.* (2019). doi:10.1038/s41596-019-0173-3
- 5       61.   Hemrich, G. *et al.* Molecular signatures of the three stem cell lineages in hydra and the  
6       emergence of stem cell function at the base of multicellularity. *Mol. Biol. Evol.* **29**, 3267–  
7       80 (2012).
- 8       62.   Wittlieb, J., Khalturin, K., Lohmann, J. U., Anton-Erxleben, F. & Bosch, T. C. G.  
9       Transgenic Hydra allow in vivo tracking of individual stem cells during morphogenesis.  
10      *Proc. Natl. Acad. Sci. U. S. A.* **103**, 6208–11 (2006).
- 11      63.   Picelli, S. *et al.* Smart-seq2 for sensitive full-length transcriptome profiling in single cells.  
12      *Nat. Methods* **10**, 1096 (2013).
- 13      64.   Mortzfeld, B. M. *et al.* Temperature and insulin signaling regulate body size in Hydra by  
14      the Wnt and TGF-beta pathways. *Nat. Commun.* **10**, 3257 (2019).
- 15      65.   Shaffer, A. L. *et al.* Signatures of the immune response. *Immunity* **15**, 375–385 (2001).
- 16      66.   Petersen, T. N., Brunak, S., Von Heijne, G. & Nielsen, H. SignalP 4.0: discriminating  
17      signal peptides from transmembrane regions. *Nat. Methods* **8**, 785 (2011).
- 18      67.   Garnier, J., Gibrat, J.-F. & Robson, B. GOR method for predicting protein secondary  
19      structure from amino acid sequence. in *Methods in enzymology* **266**, 540–553 (Elsevier,  
20      1996).
- 21      68.   Almagro Armenteros, J. J., Sønderby, C. K., Sønderby, S. K., Nielsen, H. & Winther, O.  
22      DeepLoc: prediction of protein subcellular localization using deep learning.

- 1            *Bioinformatics* **33**, 3387–3395 (2017).
- 2            69. Letunic, I. & Bork, P. 20 years of the SMART protein domain annotation resource.  
3            *Nucleic Acids Res.* **46**, D493–D496 (2017).
- 4            70. Dobin, A. *et al.* STAR: ultrafast universal RNA-seq aligner. *Bioinformatics* **29**, 15–21  
5            (2013).
- 6            71. Wang, L., Wang, S. & Li, W. RSeQC: quality control of RNA-seq experiments.  
7            *Bioinformatics* **28**, 2184–2185 (2012).
- 8            72. Li, B. & Dewey, C. N. RSEM: accurate transcript quantification from RNA-Seq data with  
9            or without a reference genome. *BMC Bioinformatics* **12**, 323 (2011).
- 10           73. Klimovich, A. *et al.* Non-senescent Hydra tolerates severe disturbances in the nuclear  
11           lamina. *Aging (Albany NY)* **10**, 951 (2018).
- 12           74. Lenhoff, H. M. Activation of the feeding reflex in *Hydra littoralis*: I. Role played by  
13           reduced glutathione, and quantitative assay of the feeding reflex. *J. Gen. Physiol.* **45**, 331–  
14           344 (1961).
- 15           75. Fraune, S. *et al.* Bacteria–bacteria interactions within the microbiota of the ancestral  
16           metazoan Hydra contribute to fungal resistance. *ISME J.* **9**, 1543 (2014).
- 17           76. Krogh, A., Larsson, B., Von Heijne, G. & Sonnhammer, E. L. L. Predicting  
18           transmembrane protein topology with a hidden Markov model: application to complete  
19           genomes. *J. Mol. Biol.* **305**, 567–580 (2001).
- 20           77. Edgar, R. C. MUSCLE: multiple sequence alignment with high accuracy and high  
21           throughput. *Nucleic Acids Res.* **32**, 1792–1797 (2004).
- 22           78. Domazet-Lošo, T. *et al.* Naturally occurring tumours in the basal metazoan Hydra. *Nat.*

- 1            *Commun.* **5**, 4222 (2014).
- 2            79. Le, S. Q. & Gascuel, O. An improved general amino acid replacement matrix. *Mol. Biol.*  
3            *Evol.* **25**, 1307–1320 (2008).
- 4            80. Kumar, S., Stecher, G., Tamura, K., Le, S. Q. & Gascuel, O. MEGA7: molecular  
5            evolutionary genetics analysis version 7.0 for bigger datasets. *Mol. Biol. Evol.* **33**, 1870–  
6            1874 (2016).
- 7            81. Moran, Y., Barzilai, M. G., Liebeskind, B. J. & Zakon, H. H. Evolution of voltage-gated  
8            ion channels at the emergence of Metazoa. *J. Exp. Biol.* **218**, 515–525 (2015).
- 9            82. Oz, M., El Nebrisi, E. G., Yang, K.-H. S., Howarth, F. C. & Al Kury, L. T. Cellular and  
10            Molecular Targets of Menthol Actions. *Frontiers in Pharmacology* **8**, 472 (2017).

11

12            **Supplementary information is available for this paper:** Extended Data Figures 1 to 19,  
13            Extended Data 1 to 8, Supplementary Table 1,

14

## 15            **Acknowledgements**

16            We thank Vassilis Pachnis for critically reading the manuscript and for sharing unpublished  
17            observations in mouse enteric neurons. The authors are thankful to Eva Herbst (Kiel University),  
18            Hans-Heinrich Oberg (UKSH, Kiel), Kiran Sedimbi (SciLifeLab, Stockholm), Simone Picelli  
19            (IOB, Basel) and The Eukaryotic Single Cell Genomics (ESCG) facility at SciLifeLab for  
20            technical support, and to the Uppsala Multidisciplinary Center for Advanced Computational  
21            Science (UPPMAX) for providing computational infrastructure. The authors also appreciate the  
22            help of Jan Taubenheim (Heinrich Heine University, Düsseldorf) and Tatiana Chontorotzea

1 (Medical University of Vienna) for help in analyzing the data. The authors are thankful to  
2 Toshitaka Fujisawa (COS, Heidelberg) for providing access to Hydra Peptide database.  
3 **Funding:** The work was supported in part by grants (to T.C.G.B.) from the Deutsche  
4 Forschungsgemeinschaft (DFG) and the CRC 1182 (“Origin and Function of Metaorganisms”).  
5 T.C.G.B. appreciates support from the Canadian Institute for Advanced Research (CIFAR) and  
6 thanks the Wissenschaftskolleg (Institute of Advanced Studies) in Berlin for a sabbatical leave.  
7 I.A. was supported by Swedish Research Council and ERC Consolidator grant (STEMMING-  
8 FROM-NERVE). A.K. was supported by Alexander von Humboldt Foundation. S.G. and Å.B.  
9 were financially supported by the Knut and Alice Wallenberg Foundation as part of the National  
10 Bioinformatics Infrastructure Sweden at SciLifeLab (grant to I.A. and A.K.).

11

## 12 **Author contributions**

13 A.K., M.K., C.G., A.M., A.-S. M., G.C. acquired all biological data and performed the relevant  
14 analysis. S.G. analyzed single-cell data. Å.B. performed read alignment and quality filters. S.G.,  
15 L.F. annotated differentially expressed genes. J.d.A. and G.C.L.W. developed and implemented  
16 computational methods. A.K., M.D’A., I.A., T.C.G.B. conceptualized and designed the study  
17 and wrote the manuscript. A.K., I.A. and T.C.G.B. supervised the study and acquired the  
18 financial support for the study.

19

## 20 **Competing interests**

21 Authors declare no competing interests.

22

23



1       **Data and materials availability**

2       Raw sequence reads from single-cell RNA-seq datasets have been deposited in the GEO under  
3       accession code XXXXXX. The pipeline used for read mapping and quantification of scRNA-seq  
4       data is available at: <https://bitbucket.org/scilifelab-lts/lts-workflows-sm-scrnaseq>. R code written  
5       to analyze the scRNA-seq data is available upon request. The transgenic *Hydra* line is available  
6       from the laboratory of Thomas C.G. Bosch. All data needed to evaluate the conclusions in the  
7       paper are present in the paper or the supplementary materials.

8

9       **Correspondence and requests for materials should be addressed to:**

10       tbosch@zoologie.uni-kiel.de (T.B.) and aklimovich@zoologie.uni-kiel.de (A.K.)

11

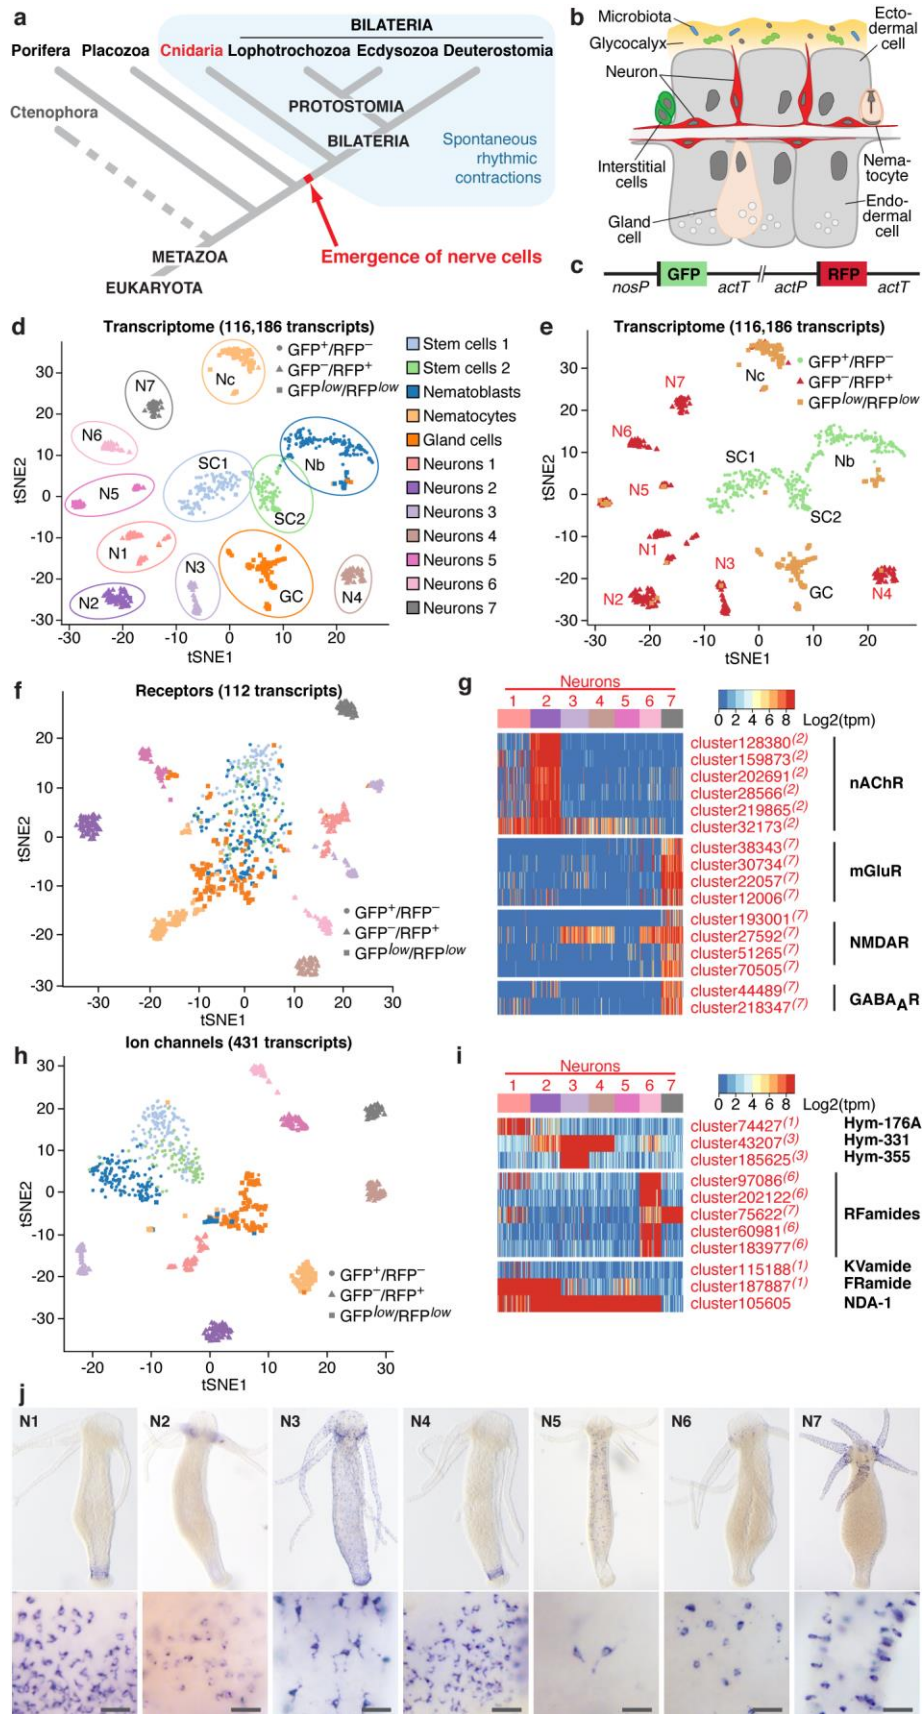

1 **Fig. 1. Single-cell transcriptome profiling uncovers the molecular anatomy of *Hydra***  
2 **nervous system. a**, Emergence of the first nerve cells preceded the divergence of Cnidaria and  
3 Bilateria. Cnidarians possess structurally simple nervous systems and offer a great potential to  
4 reveal the fundamental structural and functional principles of neural circuits. Spontaneous  
5 rhythmic contractions are ubiquitously observed in Eumetazoa. **b**, The *Hydra* body is made of  
6 three cell lineages: the ectodermal and endodermal epithelia separated by the extracellular  
7 matrix, and the lineage of interstitial cells. The outer surface of the ectoderm is covered by a  
8 glycocalyx that serves as a habitat for symbiotic bacteria. The endoderm lining the gastric cavity,  
9 is free of glycocalyx and stable microbiota. Two nerve nets made of sensory and ganglion  
10 neurons are embedded within the both epithelia. **c**, Genetic construct used to generate transgenic  
11 *Hydra* polyps and differentially label cells within the interstitial lineage by a combination of two  
12 fluorescent proteins. Green fluorescent protein (GFP) was expressed under a stem-cell specific  
13 *nanos* promoter (nos-P), the red fluorescent protein (RFP) was driven by the *actin* promoter (act-  
14 P) that is particularly active in terminally differentiated neurons. Both cassettes are flanked by  
15 the *actin* terminator (act-T). **d**, t-SNE map constructed by dimensionality-reduction principal  
16 component analysis defined by highly covariable genes (see Methods). Total 928 cells were  
17 partitioned in 12 clusters and colored by their cell-type identities inferred from expressed  
18 proliferation- and cell type-specific marker genes (see Supplementary Data 5 and 6). **e**, t-SNE  
19 map based on analysis of the entire reference transcriptome made of 116,186 transcripts clearly  
20 segregates 12 clusters, including 7 subpopulations of neurons. Cells are color-coded by their  
21 phenotype captured by FACS upon sorting. **f**, t-SNE map based on expression analysis of 112  
22 transcripts coding for putative neurotransmitter receptors (see Supplementary Data 7). While  
23 stem cells and nematoblasts, nematocytes and gland cells form one cluster, neuronal populations  
24 are clearly segregated, indicating that each neuronal population is characterized by a specific set

1 of receptors. **g**, Heatmap illustrating expression of genes coding for putative nicotinic  
2 acetylcholine receptors (nAChR), muscarinic and N-methyl-D-aspartate glutamate receptors  
3 (mGluR and NMDAR), and  $\gamma$ -aminobutyric acid type-A receptors (GABA<sub>A</sub>R) within seven  
4 neuronal populations. Expression within the entire interstitial lineage is presented in Extended  
5 Data Fig. 3. Transcripts specifically upregulated in the neurons are labelled red, superscript  
6 numbers indicate the nerve cell cluster (N1-N7) where the transcripts are significantly  
7 ( $p_{adj} < 0.05$ ) enriched. **h**, t-SNE map constructed by expression analysis of 431 transcripts coding  
8 for putative ion channels (see Supplementary Data 8). Seven neuronal populations are clearly  
9 segregated, suggesting that each neuronal population is characterized by a specific set of  
10 channels. **i**, Heatmap illustrates expression of 11 genes coding for main known neuropeptides in  
11 *Hydra*. Each neuronal population expresses a unique combination of neuropeptides. **j**, *In situ*  
12 hybridization for marker genes strongly enriched in each of seven nerve cells clusters (N1-N7,  
13 see Extended Data Fig. 6) reveals that seven neuronal subpopulations reside in spatially  
14 restricted domains along the body column of *Hydra*. Scale bar: 25  $\mu$ m.

15

16

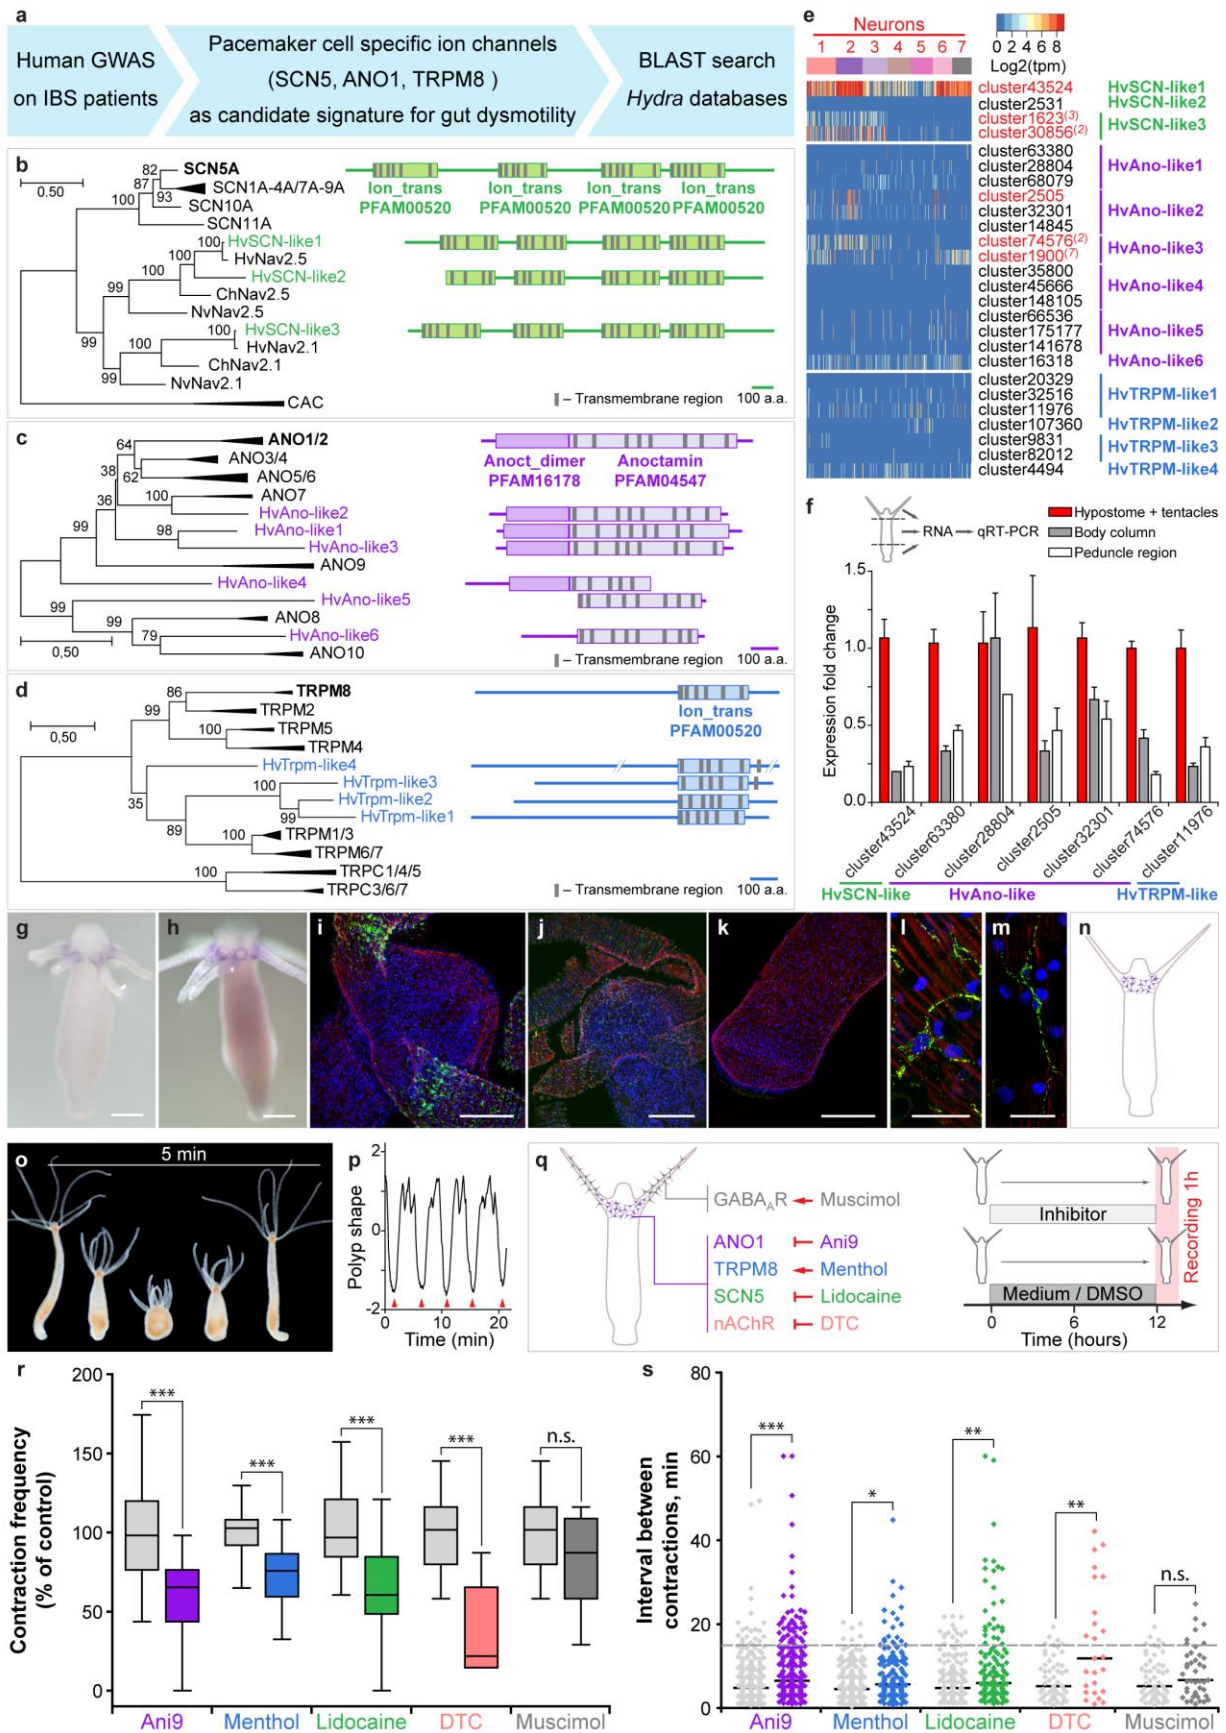



1 **Fig. 2. Identification of *Hydra* pacemaker cells using orthologs of human ion channels. a,**  
2 Genome-wide association studies on patients with gut motility disorders such as irritable bowel  
3 syndrome (IBS) identified a set of ion channels SCN5, ANO1 and TRPM8 that are expressed in  
4 human pacemaker cells (ICCs) and found to be essential for gut motility control. BLAST search  
5 was used to identify the homologous genes in *Hydra*. **b–d**, Pacemaker-specific ion channels are  
6 highly conserved in *Hydra*. Phylogenetic tree and domain structure of human SCN (on B),  
7 ANO1 (on c) and TRPM (on d) channels and the orthologs from *Hydra* (Hv). Additionally,  
8 sequences from other cnidarians, *Nematostella vectensis* (Nv) and *Clytia hemisphaerica* (Ch) are  
9 included to the phylogenetic analysis. Non-collapsed trees are presented on Extended Data  
10 Fig. 8–10. The topology and domain structure of three *Hydra* SCN-like sodium channels, six  
11 ANO1-like chloride channels and four homologues of TRPM-like cation channels are  
12 remarkably similar to their human counterparts. **e**, Expression of genes encoding SCN-, ANO1-  
13 and TRPM-like channels in *Hydra* single-cell dataset is overall very weak, and restricted to only  
14 few cells. However, several transcripts coding for SCN- and ANO1-homologues are significantly  
15 up-regulated in neurons (red) with some of the transcripts specifically enriched in neuronal  
16 subpopulation N2 (red superscript). **f**, Expression levels of most transcripts coding for SCN-,  
17 ANO1- and TRPM-like channels are highest in head region of *Hydra*, including the hypostome  
18 and tentacles, as revealed by real-time PCR analysis. Mean+S.E.M.,  $n=3-6$ . **g–h**, *In situ*  
19 hybridization with two probes specific for the transcripts *cluster2505* (coding for an ANO1-like  
20 channel) and *cluster30856* (SCN-like), confirms their localized expression in the base of  
21 tentacles. **i–m**, Immunohistochemical analysis using specific antibodies raised against synthetic  
22 peptides (confirmed the presence of ANO1-like (on i and l) and SCN-like (on j and m) channels  
23 in the neurons of the subpopulation N2 at the base of tentacles. No signal can be detected in the  
24 peduncle region of *Hydra* (on k). **n**, Taken together, the expression of gut dysmotility-associated

1 ion channels identifies the nerve cell population N2 resident at the base of tentacles as putative  
2 pacemakers in *Hydra*. Scale bars: 100  $\mu\text{m}$  (on g and h), 50  $\mu\text{m}$  (on i, j, k) and 20  $\mu\text{m}$  (on l and  
3 m). **Pharmacological interference experiments corroborate the essential role of Ano-, SCN-  
4 and TRPM-like channels and nicotinic acetylcholine receptors expressed in the neuronal  
5 population N2 in pacemaker activity in *Hydra*.** **o**, *Hydra* demonstrates a spontaneous rhythmic  
6 contractions followed by body extensions that occur on average every five minutes. **p**, The  
7 contraction pattern was video-recorded, transformed into a diagram of polyp shape, and used to  
8 assess the contraction frequency, defined as the number of full body contractions (red  
9 arrowheads) occurred within one hour, and the time intervals between consecutive contractions.  
10 **q**, Polyps were exposed to chemicals specifically modulating the activity of the ANO1-, SCN-  
11 and TRPM-like ion channels and nicotinic acetylcholine receptors (nAChR) expressed in the  
12 neuronal population N2. Experimental design: normal *Hydra* polyps were incubated in the  
13 inhibitors for 12 hours prior to a 1 hour recording of contractile behavior. Polyps incubated in  
14 0.16% DMSO-supplemented (for Ani9) or pure (all other chemicals) *Hydra*-medium served as  
15 control. **r**, Contraction frequency is reduced in the presence of all chemicals targeting the  
16 channels expressed on the pacemaker population N2, but not affected in the presence of  
17 muscimol, which likely interferes with the population N7. **s**, Modulating the activity of the  
18 pacemaker-specific ANO1-, SCN- and TRPM-like channels and nAChRs in *Hydra* also disturbs  
19 the rhythmicity of spontaneous contractions, since the intervals between contractions become  
20 longer and less regular. Sampling size:  $n=10-49$  animals (contraction frequency),  $n=25-283$   
21 intervals (interval length), \* -  $p<0.05$ ; \*\* -  $p<0.005$ ; \*\*\* -  $p<0.0005$ ; n.s. –  $p>0.05$ .

22

1

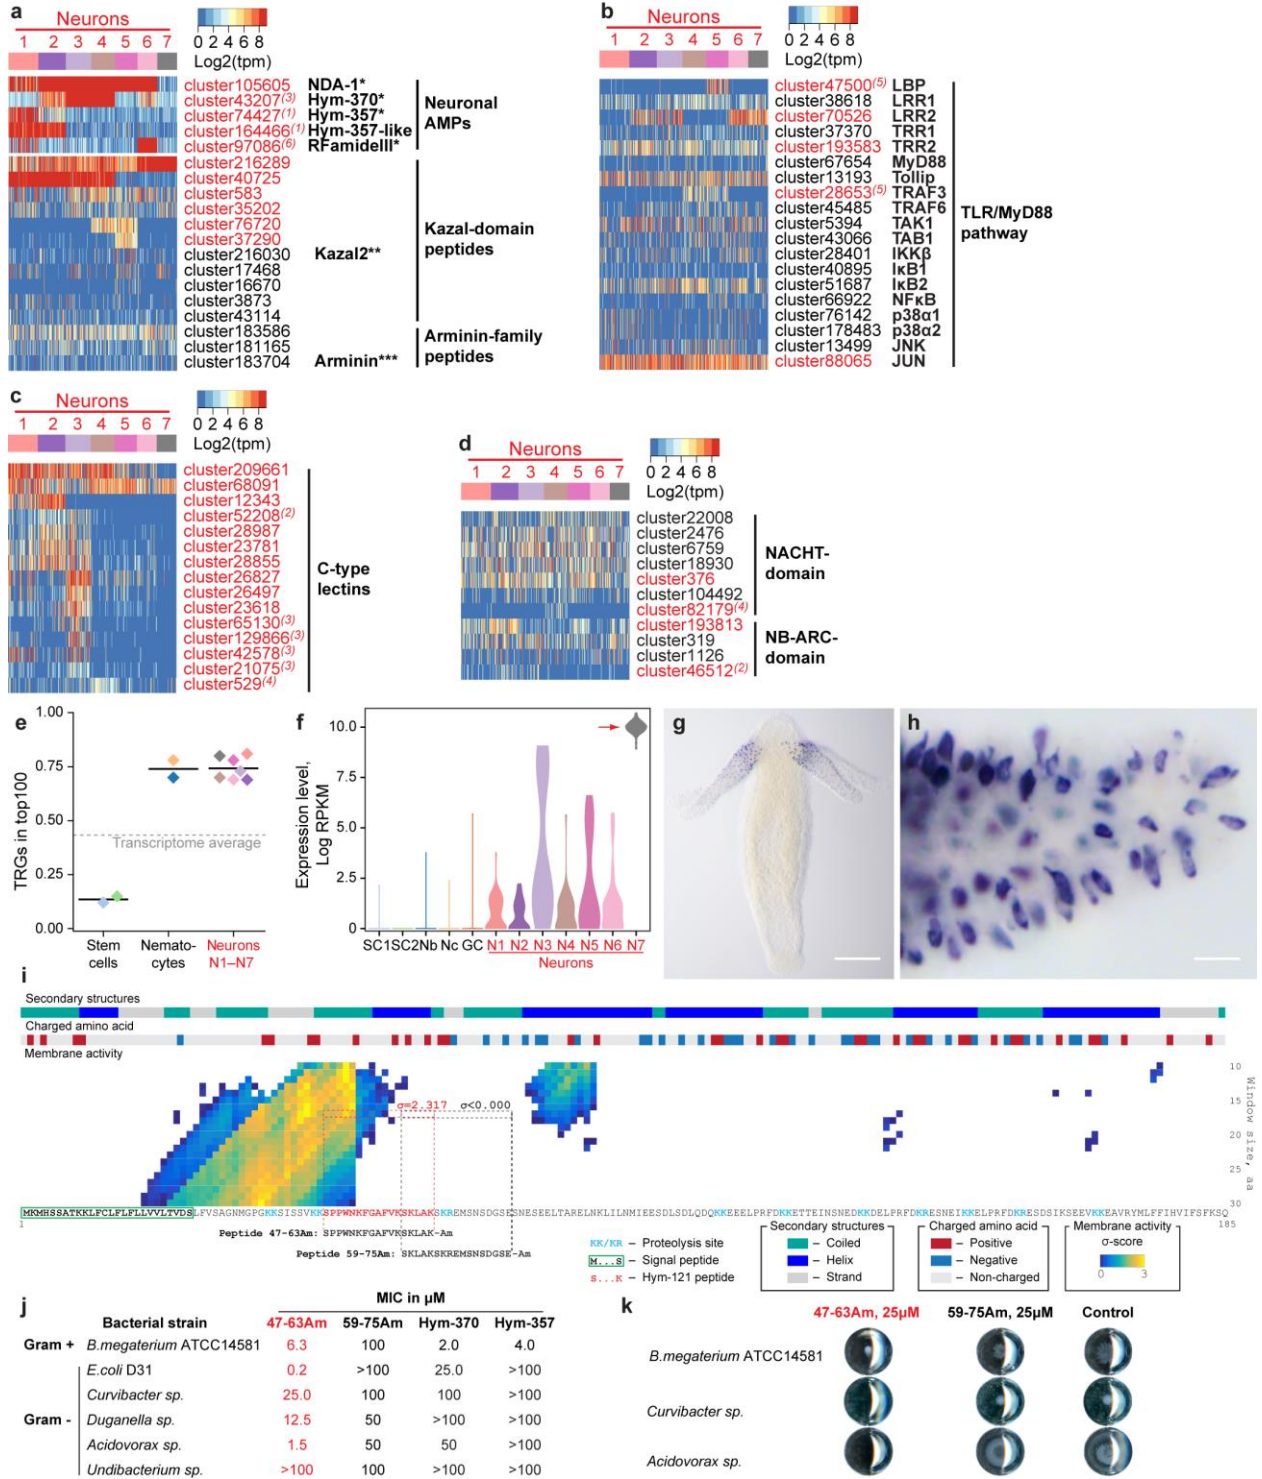

2

3



1

2 **Fig. 3. Neurons in *Hydra* are immunocompetent cells.** **a**, Neurons express a rich set of  
3 peptides that have been previously characterized as antimicrobial peptides or their homologues.  
4 \*- ref.<sup>43</sup>; \*\*- ref.<sup>44</sup>; \*\*\*- ref.<sup>46</sup>. **b**, Heatmap illustrates expression of transcripts coding for  
5 components of the Toll-like receptor (TLR)/MyD88-dependent immune pathway. Most  
6 components are present in the neurons, and five of them are significantly enriched in the  
7 neuronal population (red). Superscript numbers indicate the nerve cell cluster (N1-N7) where the  
8 transcripts are significantly ( $p_{adj} < 0.05$ ) enriched. **c**, Heatmap illustrates expression of some  
9 transcripts coding for NACHT- and NB-ARC-domain containing NOD-like receptors that have  
10 immune function. **d**, Multiple C-type lectin receptors that might recognize bacterial products are  
11 strongly expressed in the neurons. **e**, Over 70% of top100 transcripts specifically expressed in  
12 each of seven neuronal subpopulations (N1-N7) is represented by genes that have no  
13 homologues outside of Cnidaria, and thus are considered as TRGs. On the contrary, among the  
14 top 100 transcripts specifically enriched in the interstitial stem cells, only 15% are identified as  
15 TRGs. **f**, Transcripts coded by a TRG *cluster62692* are strongly upregulated in the neuronal  
16 subpopulation N7, weakly expressed in other neurons, and absent from non-neuronal cells of the  
17 interstitial lineage. **g–h**, *In situ* hybridization provides evidence that the TRG *cluster62692* is  
18 expressed exclusively in the sensory neurons of the tentacles. Scale bar: 100  $\mu\text{m}$  (on g), 10  $\mu\text{m}$   
19 (on h). **i**, Moving window small-peptide scan prediction map for the peptide encoded by TRG  
20 *cluster62692* with residue charge and secondary structure annotations. The heat map reflects the  
21 peptide's probability ( $\sigma$ -score) of being membrane active as predicted by the machine learning  
22 classifier<sup>49</sup>, and it is labeled at the first aa in the moving window frame. High  $\sigma$ -scores (yellow)  
23 suggest that *cluster62692* peptide is a potent antimicrobial peptide. An N-terminal signal peptide  
24 and multiple putative proteolysis sites, as well as a sequence identical to a previously described

1 peptide Hym-121 (SPPWNKFGAFVKSKLAK-amide)<sup>50</sup> are found within the *cluster62692*  
2 peptide, providing evidence that a preprohormone *cluster62692* is processed and gives rise to a  
3 secreted active peptide. The 17 aa long peptide corresponding to aa 47-63  
4 (SPPWNKFGAFVKSKLAK=Hym-121) with high membrane activity score ( $\sigma=2.317$ ) and  
5 control peptide aa 59-75 (SKLAKSKREMSNSDGSE) with no membrane activity score ( $\sigma=-$   
6 1.878) were synthesized, C-terminally amidated, and tested for antimicrobial activity in a  
7 Minimum Inhibitory Concentration (MIC) assay. **j**, The peptide 47-63Am is a potent  
8 antimicrobial peptide that shows selective growth inhibiting activity against Gram-positive and -  
9 negative bacteria. The control peptide 59-75Am demonstrates no antimicrobial activity.  
10 Consistently with the previous observations<sup>43</sup>, dual-function neuropeptides Hym-370 and Hym-  
11 357 show some antibacterial activity, yet weaker and more restricted than the peptide 47-63Am.  
12 **k**, Representative wells from plates of MIC assay. At concentration 25  $\mu$ M, the peptide 47-63Am  
13 inhibits growth of *E. coli* and *Acidovorax sp.* and affects colony morphology of *B. megaterium*.  
14 The growth in the presence of control peptide (59-75Am, 25  $\mu$ M) is not different from that in the  
15 pure medium (control).

16

17

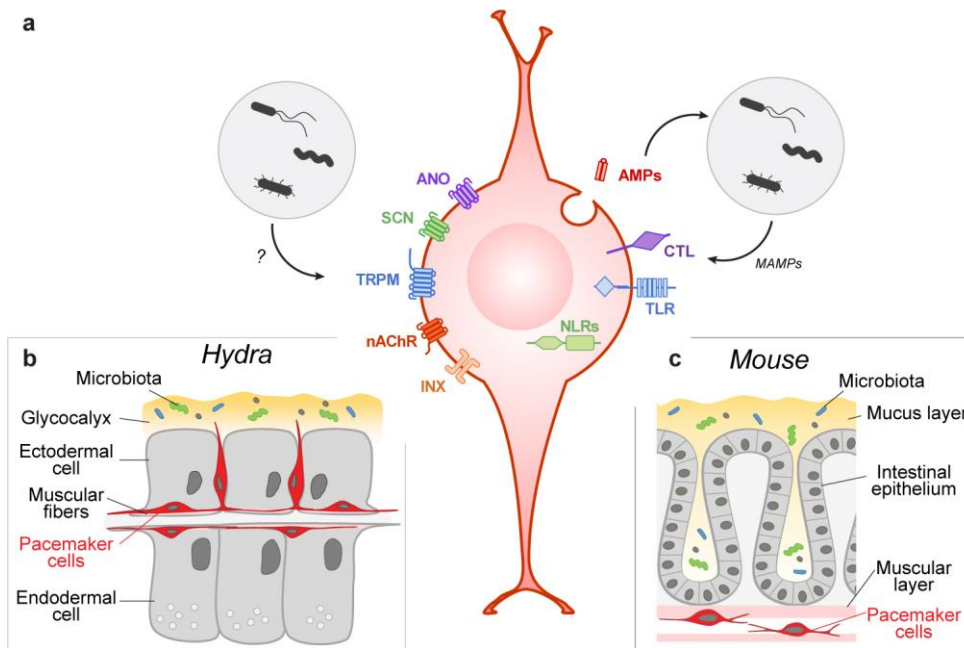

1

2

3

4

5

6

7

8

9

10

11

**Fig. 4. The molecular anatomy of the prototypical pacemaker cell. a–c,** The gene expression program characteristic for pacemaker cells is highly conserved and is present in both, the neuronal population N2 that controls spontaneous contractions in *Hydra* (on b), and in the ICC driving the gut motility in mammals (on c). This evolutionary conserved signature of a pacemaker cell is made up of Ano-, SCN- and TRPM-like ion channels, nACh receptors and innexin gap junction. It also includes receptors such as Toll- and NOD-like receptors and C-type lectins, that are capable of recognizing bacterial products (MAMPs) and thus mediating the interaction between the host and its microbiota. The ion channels and neurotransmitter receptors might be also targets for bacteria-derived products.
